# Supplementary material for: Data-sharing and re-analysis for main studies assessed by the European Medicines Agency—a cross-sectional study on European Public Assessment Reports
Source: Springer Nature journal article supplement (doi:10.1186/s12916-022-02377-2), 2022-05-20

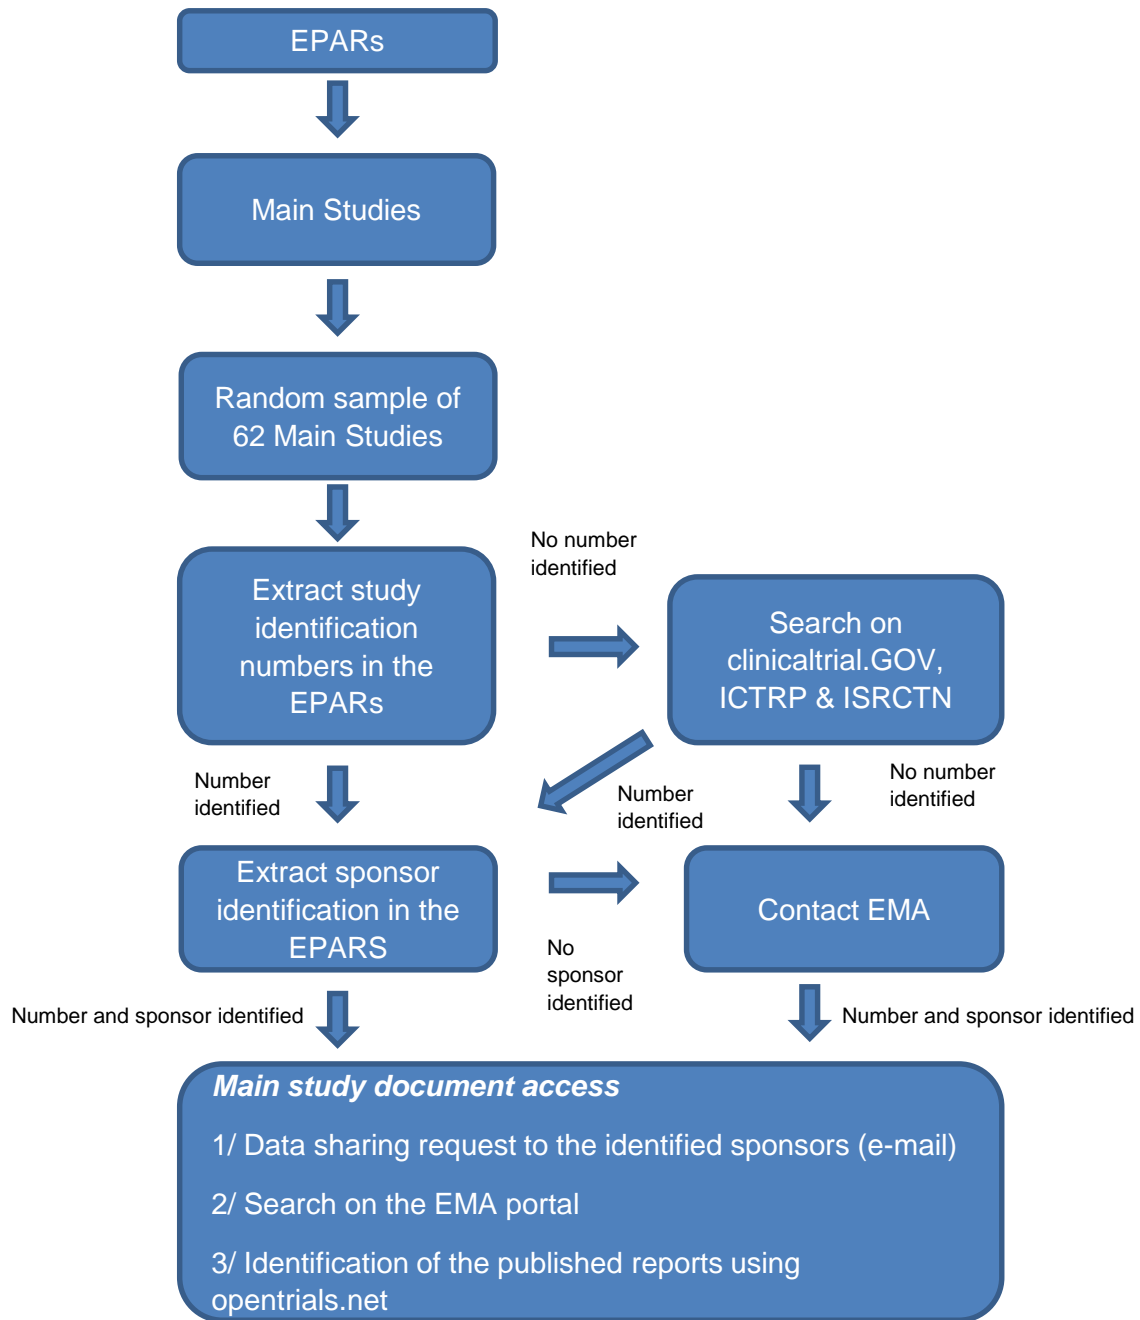

Supplement: MOESM3 [file 22165890]
